# Supplementary material for: Centenarian controls increase variant effect sizes by an average twofold in an extreme case–extreme control analysis of Alzheimer’s disease
Source: PubMed Central journal article supplement (PMC6336855; doi:10.1038/s41431-018-0273-5), 2018-09-26
Supplement: 41431_2018_273_MOESM1_ESM.pdf [file 41431_2018_273_MOESM1_ESM.pdf]

1 **Table S1:** Characteristics of the 29 genome-wide significant genetic variants associated with Alzheimer's disease.

| Chr | Pos       | A0 | A1 | rs ID       | Gene         | AF    | Locus discovered in                                              | Effect estimate from           | log OR <sub>I</sub> <sup>k</sup> | Type      | Rsq  |
|-----|-----------|----|----|-------------|--------------|-------|------------------------------------------------------------------|--------------------------------|----------------------------------|-----------|------|
| 1   | 207692049 | A  | G  | rs6656401   | CR1          | 0.803 | Lambert <i>et al.</i> (2009)                                     | Lambert <i>et al.</i> (2013)   | -0.17                            | Genotyped | -    |
| 2   | 127892810 | C  | T  | rs6733839   | BIN1         | 0.409 | Seshadri <i>et al.</i> (2010)                                    | Lambert <i>et al.</i> (2013)   | 0.20                             | Genotyped | -    |
| 2   | 234068476 | C  | T  | rs35349669  | INPP5D       | 0.512 | Lambert <i>et al.</i> (2013)                                     | Lambert <i>et al.</i> (2013)   | 0.08                             | Genotyped | -    |
| 4   | 11711232  | T  | G  | rs13113697  | HS3ST1       | 0.282 | Desikan <i>et al.</i> (2015)                                     | Desikan <i>et al.</i> (2015)   | -0.07                            | Imputed   | 0.96 |
| 5   | 88223420  | G  | A  | rs190982    | MEF2C        | 0.408 | Lambert <i>et al.</i> (2013)                                     | Lambert <i>et al.</i> (2013)   | 0.08                             | Genotyped | -    |
| 6   | 32578530  | C  | A  | rs9271192   | HLA-DRB1     | 0.724 | Lambert <i>et al.</i> (2013)                                     | Lambert <i>et al.</i> (2013)   | -0.11                            | Genotyped | -    |
| 6   | 41129207  | C  | T  | rs143332484 | TREM2 R62H   | 0.007 | Sims <i>et al.</i> (2017)                                        | Sims <i>et al.</i> (2017)      | 0.50                             | Genotyped | -    |
| 6   | 41129252  | C  | T  | rs75932628  | TREM2 R47H   | 0.001 | Guerreiro <i>et al.</i> (2013), Jonsson <i>et al.</i> (2013)     | Sims <i>et al.</i> (2017)      | 0.89                             | Imputed   | 0.68 |
| 6   | 47487762  | A  | G  | rs10948363  | CD2AP        | 0.266 | Hollingworth <i>et al.</i> (2011), Naj <i>et al.</i> (2011)      | Lambert <i>et al.</i> (2013)   | 0.10                             | Genotyped | -    |
| 7   | 37841534  | A  | G  | rs2718058   | NME8         | 0.373 | Lambert <i>et al.</i> (2013)                                     | Lambert <i>et al.</i> (2013)   | -0.08                            | Genotyped | -    |
| 7   | 100004446 | C  | T  | rs1476679   | ZCWPW1       | 0.713 | Lambert <i>et al.</i> (2013)                                     | Lambert <i>et al.</i> (2013)   | 0.09                             | Genotyped | -    |
| 7   | 143110762 | G  | A  | rs11771145  | EPHA1        | 0.338 | Hollingworth <i>et al.</i> (2011), Naj <i>et al.</i> (2011)      | Lambert <i>et al.</i> (2013)   | -0.10                            | Genotyped | -    |
| 8   | 27195121  | T  | C  | rs28834970  | PTK2B        | 0.366 | Lambert <i>et al.</i> (2013)                                     | Lambert <i>et al.</i> (2013)   | 0.10                             | Genotyped | -    |
| 8   | 27467686  | C  | T  | rs9331896   | CLU          | 0.379 | Harold <i>et al.</i> (2009), Lambert <i>et al.</i> (2009)        | Lambert <i>et al.</i> (2013)   | 0.15                             | Genotyped | -    |
| 10  | 11720308  | A  | G  | rs7920721   | ECHDC3       | 0.387 | Desikan <i>et al.</i> (2015)                                     | Desikan <i>et al.</i> (2015)   | 0.07                             | Imputed   | 0.98 |
| 11  | 47557871  | T  | C  | rs10838725  | CELF1        | 0.316 | Lambert <i>et al.</i> (2013)                                     | Lambert <i>et al.</i> (2013)   | 0.08                             | Genotyped | -    |
| 11  | 59923508  | A  | G  | rs983392    | MS4A6A       | 0.403 | Hollingworth <i>et al.</i> (2011), Naj <i>et al.</i> (2011)      | Lambert <i>et al.</i> (2013)   | -0.10                            | Genotyped | -    |
| 11  | 85867875  | A  | G  | rs10792832  | PICALM       | 0.642 | Harold <i>et al.</i> (2009)                                      | Lambert <i>et al.</i> (2013)   | 0.14                             | Genotyped | -    |
| 11  | 121435587 | T  | C  | rs11218343  | SORL1        | 0.039 | Lambert <i>et al.</i> (2013)                                     | Lambert <i>et al.</i> (2013)   | -0.26                            | Genotyped | -    |
| 14  | 53400629  | T  | C  | rs17125944  | FERMT2       | 0.092 | Lambert <i>et al.</i> (2013)                                     | Lambert <i>et al.</i> (2013)   | 0.13                             | Genotyped | -    |
| 14  | 92926952  | G  | T  | rs10498633  | SLC24A4-RIN3 | 0.217 | Lambert <i>et al.</i> (2013)                                     | Lambert <i>et al.</i> (2013)   | -0.09                            | Genotyped | -    |
| 16  | 81942028  | C  | G  | rs72824905  | PLCG2        | 0.015 | Sims <i>et al.</i> (2017)                                        | Sims <i>et al.</i> (2017)      | -0.39                            | Imputed   | 0.88 |
| 17  | 44353222  | T  | G  | rs2732703   | KANSL1       | 0.127 | Jun <i>et al.</i> (2016)                                         | Lambert <i>et al.</i> (2013)   | -0.14                            | Imputed   | 0.81 |
| 17  | 47297297  | T  | C  | rs616338    | ABI3         | 0.006 | Sims <i>et al.</i> (2017)                                        | Sims <i>et al.</i> (2017)      | -0.36                            | Imputed   | 0.71 |
| 19  | 1061892   | G  | C  | rs200538373 | ABCA7 G>C    | 0.001 | Steinberg <i>et al.</i> (2015)                                   | Steinberg <i>et al.</i> (2015) | -0.65                            | Imputed   | 0.76 |
| 19  | 1063443   | A  | G  | rs4147929   | ABCA7 A>G    | 0.810 | Hollingworth <i>et al.</i> (2011), Naj <i>et al.</i> (2011)      | Lambert <i>et al.</i> (2013)   | -0.14                            | Imputed   | 0.99 |
| 19  | 45411941  | T  | C  | rs429358    | ApoE E4      | 0.148 | Saunders <i>et al.</i> (1993), Strittmatter <i>et al.</i> (1993) | Sims <i>et al.</i> (2017)      | 1.05                             | Imputed   | 0.99 |
| 19  | 45412079  | C  | T  | rs7412      | ApoE E2      | 0.072 | Corder <i>et al.</i> (1994)                                      | Sims <i>et al.</i> (2017)      | -0.79                            | Genotyped | -    |
| 20  | 55018260  | T  | C  | rs7274581   | CASS4        | 0.083 | Lambert <i>et al.</i> (2013)                                     | Lambert <i>et al.</i> (2013)   | -0.13                            | Genotyped | -    |

2 Abbreviations: *Chr*, chromosome; *Pos*, chromosomal position (GRCh37, hg19); *A0*, reference allele in HRC reference panel; *A1*, tested allele (alternative allele in HRC  
3 reference panel); *rs ID*, variant ID; *Gene*, gene associated with the variant; *AF*, frequency of A1 in HRC reference panel;  $\log OR_i^k$ , published log(odds ratio) and relative  
4 standard errors, *i.e* the first or largest case-control study that reported the variant association with AD; *Type*, whether the variant was genotyped or imputed in our datasets;  
5 *Rsq*, imputation quality for imputed variants. References to the papers reported in this table are: <sup>4-17</sup>.

6 **Table S2:** Human Genome Variation Society (HGVS) codes for the tested  
7 variants

8

| Genomic position | Rs ID       | Ref HRC | Alt HRC | HGVS nomenclature                              |
|------------------|-------------|---------|---------|------------------------------------------------|
| 1:207692049      | rs6656401   | A       | G       | <a href="#">NC_000001.10:g.207692049A&gt;G</a> |
| 2:127892810      | rs6733839   | C       | T       | <a href="#">NC_000002.11:g.127892810C&gt;T</a> |
| 2:234068476      | rs35349669  | C       | T       | <a href="#">NC_000002.11:g.234068476C&gt;T</a> |
| 4:11711232       | rs13113697  | T       | G       | <a href="#">NC_000004.11:g.11711232T&gt;G</a>  |
| 5:88223420       | rs190982    | G       | A       | <a href="#">NC_000005.9:g.88223420G&gt;A</a>   |
| 6:32578530       | rs9271192   | C       | A       | <a href="#">NT_113891.2:g.4029235A&gt;C</a>    |
| 6:41129207       | rs143332484 | C       | T       | <a href="#">NC_000006.11:g.41129207C&gt;T</a>  |
| 6:41129252       | rs75932628  | C       | T       | <a href="#">NC_000006.11:g.41129252C&gt;T</a>  |
| 6:47487762       | rs10948363  | A       | G       | <a href="#">NC_000006.11:g.47487762A&gt;G</a>  |
| 7:37841534       | rs2718058   | A       | G       | <a href="#">NC_000007.13:g.37841534A&gt;G</a>  |
| 7:100004446      | rs1476679   | C       | T       | <a href="#">NC_000007.13:g.100004446C&gt;T</a> |
| 7:143110762      | rs11771145  | G       | A       | <a href="#">NC_000007.13:g.143110762G&gt;A</a> |
| 8:27195121       | rs28834970  | T       | C       | <a href="#">NC_000008.10:g.27195121T&gt;C</a>  |
| 8:27467686       | rs9331896   | C       | T       | <a href="#">NC_000008.10:g.27467686C&gt;T</a>  |
| 10:11720308      | rs7920721   | A       | G       | <a href="#">NC_000010.10:g.11720308A&gt;G</a>  |
| 11:47557871      | rs10838725  | T       | C       | <a href="#">NC_000011.9:g.47557871T&gt;C</a>   |
| 11:59923508      | rs983392    | A       | G       | <a href="#">NC_000011.9:g.59923508A&gt;G</a>   |
| 11:85867875      | rs10792832  | A       | G       | <a href="#">NC_000011.9:g.85867875A&gt;G</a>   |
| 11:121435587     | rs11218343  | T       | C       | <a href="#">NC_000011.9:g.121435587T&gt;C</a>  |
| 14:53400629      | rs17125944  | T       | C       | <a href="#">NC_000014.8:g.53400629T&gt;C</a>   |
| 14:92926952      | rs10498633  | G       | T       | <a href="#">NC_000014.8:g.92926952G&gt;T</a>   |
| 16:81942028      | rs72824905  | C       | G       | <a href="#">NC_000016.9:g.81942028C&gt;G</a>   |
| 17:44353222      | rs2732703   | T       | G       | <a href="#">NC_000017.10:g.44353222T&gt;G</a>  |
| 17:47297297      | rs616338    | T       | C       | <a href="#">NC_000017.10:g.47297297T&gt;C</a>  |
| 19:1061892       | rs200538373 | G       | C       | <a href="#">NC_000019.9:g.1061892G&gt;C</a>    |
| 19:1063443       | rs4147929   | A       | G       | <a href="#">NC_000019.9:g.1063443A&gt;G</a>    |
| 19:45411941      | rs429358    | T       | C       | <a href="#">NC_000019.9:g.45411941T&gt;C</a>   |
| 19:45412079      | rs7412      | C       | T       | <a href="#">NC_000019.9:g.45412079C&gt;T</a>   |
| 20:55018260      | rs7274581   | T       | C       | <a href="#">NC_000020.10:g.55018260T&gt;C</a>  |

9

10 Abbreviations: Genomic position, chromosome and position an GRCh37 (hq19); Rs ID, variant identifier; Ref  
11 HRC, reference allele in Human Reference Consortium (HRC) panel; Alt HRC, alternative allele in HRC  
12 panel; HGVS nomenclature, official nomenclature according to Human Genome Variation Society (HGVS)  
13 and link to dbSNP database.

14

15 **Table S3:** Comparison between using extreme AD cases compared to using extreme controls in association analyses

| Rs ID       | Gene         | Extreme AD cases vs. Normal Controls<br>(EA vs. NC) |                            |                               |                                                | Normal AD cases vs. Extreme Controls<br>(NA vs. EC) |                                          |                                                |  |
|-------------|--------------|-----------------------------------------------------|----------------------------|-------------------------------|------------------------------------------------|-----------------------------------------------------|------------------------------------------|------------------------------------------------|--|
|             |              | log $OR_l^k$<br>(SE)                                | log $OR_{EA-NC}^k$<br>(SE) | $P$ -value <sub>EA-NC</sub>   | $E_{EA-NC}^k$<br>(95% CI, p)                   | log $OR_{NA-EC}^k$<br>(SE)                          | $P$ -value <sub>NC-EC</sub> <sup>#</sup> | $E_{NA-EC}^k$<br>(95% CI, p)                   |  |
| rs75932628  | TREM2 (R47H) | 0.89 (0.09)                                         | 1.56 (0.66)                | 1.86x10 <sup>-2</sup> *       | 1.76 (0.28 - 3.34, 3.2x10 <sup>-1</sup> )      | 3.04 (2.75)                                         | 5.11x10 <sup>-1</sup>                    | 3.42 (-3.85 - 10.92, 5.0x10 <sup>-1</sup> )    |  |
| rs7920721   | ECHDC3       | 0.07 (0.01)                                         | 0.17 (0.05)                | 2.61x10 <sup>-3</sup> *       | 2.54 (0.84 - 4.96, 7.8x10 <sup>-2</sup> )      | 0.21 (0.08)                                         | 1.51x10 <sup>-1</sup>                    | 3.14 (0.26 - 6.60, 1.5x10 <sup>-1</sup> )      |  |
| rs10498633  | SLC24A4-RIN3 | -0.09 (0.01)                                        | -0.18 (0.07)               | 8.95x10 <sup>-3</sup> *       | 1.85 (0.46 - 3.79, 2.4x10 <sup>-1</sup> )      | <b>-0.38 (0.46)</b>                                 | <b>8.59x10<sup>-3</sup>*</b>             | <b>3.93 (1.67 - 6.81, 9.2x10<sup>-3</sup>)</b> |  |
| rs2718058   | NME8         | -0.08 (0.01)                                        | -0.03 (0.06)               | 6.45x10 <sup>-1</sup>         | 0.35 (-1.16 - 1.91, 3.8x10 <sup>-1</sup> )     | <b>-0.34 (0.08)</b>                                 | <b>5.99x10<sup>-3</sup>*</b>             | <b>4.46 (1.87 - 7.90, 7.6x10<sup>-3</sup>)</b> |  |
| rs72824905  | PLCG2        | -0.39 (0.06)                                        | -0.47 (0.30)               | 1.23x10 <sup>-1</sup>         | 1.21 (-0.33 - 3.00, 7.7x10 <sup>-1</sup> )     | <b>-1.13 (0.29)</b>                                 | <b>3.47x10<sup>-2</sup>*</b>             | <b>2.89 (1.14 - 5.07, 3.4x10<sup>-2</sup>)</b> |  |
| rs9271192   | HLA-DRB1     | -0.11 (0.01)                                        | -0.13 (0.09)               | 1.40x10 <sup>-1</sup>         | 1.19 (-0.42 - 3.01, 8.0x10 <sup>-1</sup> )     | -0.34 (0.13)                                        | 1.33x10 <sup>-1</sup>                    | 3.18 (0.38 - 6.49, 1.4x10 <sup>-1</sup> )      |  |
| rs1476679   | ZCWPW1       | 0.09 (0.01)                                         | 0.14 (0.06)                | 1.94x10 <sup>-2</sup> *       | 1.59 (0.23 - 3.25, 3.9x10 <sup>-1</sup> )      | 0.20 (0.08)                                         | 2.45x10 <sup>-1</sup>                    | 2.30 (0.10 - 4.86, 2.4x10 <sup>-1</sup> )      |  |
| rs4147929   | ABCA7 (A>G)  | -0.14 (0.02)                                        | -0.17 (0.07)               | 2.13x10 <sup>-2</sup> *       | 1.18 (0.18 - 2.35, 7.4x10 <sup>-1</sup> )      | -0.31 (0.11)                                        | 2.20x10 <sup>-1</sup>                    | 2.16 (0.27 - 4.13, 2.2x10 <sup>-1</sup> )      |  |
| rs7412      | APOE (ε2)    | -0.79 (0.03)                                        | <b>-1.09 (0.14)</b>        | <b>2.36x10<sup>-15</sup>*</b> | <b>1.38 (1.02 - 1.76, 3.7x10<sup>-2</sup>)</b> | <b>-1.37 (0.12)</b>                                 | <b>3.46x10<sup>-5</sup>*</b>             | <b>1.75 (1.39 - 2.11, 1.5x10<sup>-4</sup>)</b> |  |
| rs13113697  | HS3ST1       | -0.07 (0.01)                                        | 0.00 (0.06)                | 9.70x10 <sup>-1</sup>         | 0.04 (-1.97 - 2.04, 3.1x10 <sup>-1</sup> )     | -0.18 (0.09)                                        | 3.12x10 <sup>-1</sup>                    | 2.70 (-0.60 - 6.53, 3.0x10 <sup>-1</sup> )     |  |
| rs616338    | ABI3         | -0.36 (0.05)                                        | -0.70 (0.28)               | 1.23x10 <sup>-2</sup> *       | 1.92 (0.41 - 3.79, 2.4x10 <sup>-1</sup> )      | -0.37 (0.47)                                        | 9.87x10 <sup>-1</sup>                    | 1.03 (-2.10 - 4.19, 9.7x10 <sup>-1</sup> )     |  |
| rs10948363  | CD2AP        | 0.10 (0.01)                                         | 0.07 (0.06)                | 2.79x10 <sup>-1</sup>         | 0.70 (-0.54 - 2.11, 6.5x10 <sup>-1</sup> )     | 0.22 (0.09)                                         | 2.78x10 <sup>-1</sup>                    | 2.28 (-0.01 - 4.83, 2.7x10 <sup>-1</sup> )     |  |
| rs429358    | APOE (ε4)    | 1.05 (0.03)                                         | <b>1.36 (0.07)</b>         | <b>1.19x10<sup>-84</sup>*</b> | <b>1.30 (1.16 - 1.45, 1.4x10<sup>-5</sup>)</b> | <b>1.84 (0.14)</b>                                  | <b>4.22x10<sup>-6</sup>*</b>             | <b>1.75 (1.43 - 2.07, 1.8x10<sup>-5</sup>)</b> |  |
| rs11771145  | EPHA1        | -0.10 (0.01)                                        | -0.09 (0.06)               | 1.12x10 <sup>-1</sup>         | 0.93 (-0.21 - 2.18, 8.9x10 <sup>-1</sup> )     | -0.23 (0.08)                                        | 2.06x10 <sup>-1</sup>                    | 2.24 (0.26 - 4.32, 2.1x10 <sup>-1</sup> )      |  |
| rs10838725  | CELF1        | 0.08 (0.01)                                         | 0.07 (0.06)                | 2.49x10 <sup>-1</sup>         | 0.87 (-0.61 - 2.58, 8.5x10 <sup>-1</sup> )     | 0.13 (0.09)                                         | 5.92x10 <sup>-1</sup>                    | 1.71 (-1.01 - 4.60, 5.9x10 <sup>-1</sup> )     |  |
| rs28834970  | PTK2B        | 0.10 (0.01)                                         | 0.08 (0.06)                | 1.44x10 <sup>-1</sup>         | 0.84 (-0.27 - 2.08, 7.9x10 <sup>-1</sup> )     | 0.20 (0.08)                                         | 3.04x10 <sup>-1</sup>                    | 2.03 (0.08 - 4.12, 3.0x10 <sup>-1</sup> )      |  |
| rs983392    | MS4A6A       | -0.11 (0.01)                                        | -0.02 (0.06)               | 7.08x10 <sup>-1</sup>         | 0.20 (-0.89 - 1.27, 1.4x10 <sup>-1</sup> )     | -0.26 (0.08)                                        | 1.16x10 <sup>-1</sup>                    | 2.40 (0.66 - 4.33, 1.1x10 <sup>-1</sup> )      |  |
| rs11218343  | SORL1        | -0.26 (0.03)                                        | -0.21 (0.15)               | 1.55x10 <sup>-1</sup>         | 0.82 (-0.30 - 2.03, 7.3x10 <sup>-1</sup> )     | -0.42 (0.19)                                        | 4.71x10 <sup>-1</sup>                    | 1.63 (-0.09 - 3.42, 4.6x10 <sup>-1</sup> )     |  |
| rs6733839   | BIN1         | 0.20 (0.01)                                         | 0.17 (0.06)                | 3.04x10 <sup>-3</sup> *       | 0.84 (0.27 - 1.42, 5.8x10 <sup>-1</sup> )      | 0.29 (0.08)                                         | 3.22x10 <sup>-1</sup>                    | 1.49 (0.55 - 2.48, 3.1x10 <sup>-1</sup> )      |  |
| rs10792832  | PICALM       | 0.14 (0.01)                                         | 0.17 (0.06)                | 3.25x10 <sup>-3</sup> *       | 1.20 (0.40 - 2.07, 6.3x10 <sup>-1</sup> )      | 0.15 (0.08)                                         | 8.81x10 <sup>-1</sup>                    | 1.10 (-0.28 - 2.49, 8.8x10 <sup>-1</sup> )     |  |
| rs7274581   | CASS4        | -0.13 (0.02)                                        | -0.16 (0.10)               | 1.08x10 <sup>-1</sup>         | 1.24 (-0.24 - 3.10, 7.5x10 <sup>-1</sup> )     | -0.09 (0.14)                                        | 8.18x10 <sup>-1</sup>                    | 0.70 (-1.96 - 3.33, 8.2x10 <sup>-1</sup> )     |  |
| rs143332484 | TREM2 (R62H) | 0.50 (0.07)                                         | 0.09 (0.22)                | 6.76x10 <sup>-1</sup>         | 0.19 (-0.71 - 1.10, 7.8x10 <sup>-2</sup> )     | 0.95 (0.39)                                         | 3.40x10 <sup>-1</sup>                    | 1.92 (0.05 - 3.95, 3.4x10 <sup>-1</sup> )      |  |
| rs118172952 | KANSL1       | -0.14 (0.03)                                        | -0.08 (0.08)               | 3.32x10 <sup>-1</sup>         | 0.56 (-0.65 - 2.11, 5.0x10 <sup>-1</sup> )     | -0.20 (0.11)                                        | 6.52x10 <sup>-1</sup>                    | 1.44 (-0.65 - 3.74, 6.8x10 <sup>-1</sup> )     |  |
| rs6656401   | CR1          | -0.17 (0.01)                                        | -0.12 (0.07)               | 7.04x10 <sup>-2</sup>         | 0.73 (-0.05 - 1.58, 5.1x10 <sup>-1</sup> )     | -0.18 (0.10)                                        | 8.97x10 <sup>-1</sup>                    | 1.09 (-0.32 - 2.52, 9.0x10 <sup>-1</sup> )     |  |
| rs200538373 | ABCA7 (G>C)  | -0.65 (0.14)                                        | 0.13 (0.51)                | 7.94x10 <sup>-1</sup>         | -0.21 (-1.93 - 1.49, 1.4x10 <sup>-1</sup> )    | -0.99 (0.64)                                        | 6.43x10 <sup>-1</sup>                    | 1.54 (-0.85 - 4.15, 6.3x10 <sup>-1</sup> )     |  |
| rs9331896   | CLU          | 0.15 (0.01)                                         | 0.17 (0.06)                | 3.73x10 <sup>-3</sup> *       | 1.14 (0.36 - 2.00, 7.1x10 <sup>-1</sup> )      | 0.06 (0.08)                                         | 3.96x10 <sup>-1</sup>                    | 0.43 (-0.92 - 1.73, 3.9x10 <sup>-1</sup> )     |  |
| rs35349669  | INPP5D       | 0.08 (0.01)                                         | 0.09 (0.05)                | 1.23x10 <sup>-1</sup>         | 1.15 (-0.06 - 2.53)                            | 0.04 (0.08)                                         | 6.98x10 <sup>-1</sup>                    | 0.51 (-2.23 - 3.08, 7.1x10 <sup>-1</sup> )     |  |

|                |               |                                             |              |                       |                                             |              |                       |                                             |
|----------------|---------------|---------------------------------------------|--------------|-----------------------|---------------------------------------------|--------------|-----------------------|---------------------------------------------|
| rs17125944     | <i>FERMT2</i> | 0.13 (0.02)                                 | -0.01 (0.09) | 8.75x10 <sup>-1</sup> | -0.11 (-1.30 - 1.07)                        | 0.03 (0.13)  | 5.20x10 <sup>-1</sup> | 0.26 (-2.21 - 2.60, 7.1x10 <sup>-1</sup> )  |
| rs190982       | <i>MEF2C</i>  | 0.08 (0.01)                                 | 0.00 (0.05)  | 9.94x10 <sup>-1</sup> | 0.01 (-1.25 - 1.27)                         | -0.06 (0.08) | 1.48x10 <sup>-1</sup> | -0.84 (-3.81 - 1.61, 1.4x10 <sup>-1</sup> ) |
| <b>AVERAGE</b> |               | <b>0.94 ± 0.12, p = 6.8x10<sup>-1</sup></b> |              |                       | <b>1.88 ± 0.24, p = 1.0x10<sup>-4</sup></b> |              |                       |                                             |

16

17 Abbreviations: *Rs ID*, variant identifier; *Gene*, gene associated with the variant;  $\log OR_I^k$  (*SE*), published log(odds ratio) and relative standard error;  $\log OR_{EA-NC}^k$  (*SE*),  
18 log(odds ratio) and relative standard error for comparison of extreme cases with normal controls;  $E_{EA-NC}^k$  (*95% CI, p*), increased effect-size relative to published effect-size,  
19 95% confidence interval and p-value of difference relative to published effect sizes;  $\log OR_{NA-EC}^k$  (*SE*), log(odds ratio) and relative standard error for comparison of normal  
20 AD cases with centenarian controls;  $E_{NA-EC}^k$  (*95% CI, p*), increased effect-size, 95% confidence intervals and p-value of difference relative to published effect-size; Bold  
21 type: variants with significant  $E_{1-2}^k$ ; Stars\*: p-value significant at nominal threshold ( $p < 0.05$ ); Asterisk#: p-value of association of Normal Controls (*NC*) and Extreme Controls  
22 (*EC*).  
23

24 **Table S4:** Comparison between using younger early-onset cases (AAO <60 years) early-onset cases (AAO <65 years) and  
25 using late-onset AD cases (AAO >65 years) relative to normal controls

| Rs ID            | Gene             | log OR <sub>I</sub> <sup>k</sup><br>(SE) | Younger early-onset AD cases (AAO < 60 y.o) vs. Normal Controls (yEA vs. NC) |                           |                                                 | Early-onset cases (AAO < 65 y.o) vs. Normal Controls (eEA vs. NC) |                               |                                                 | Late-onset cases (AAO > 65 y.o) vs. Normal Controls (IEA vs. NC) |                              |                                                 |
|------------------|------------------|------------------------------------------|------------------------------------------------------------------------------|---------------------------|-------------------------------------------------|-------------------------------------------------------------------|-------------------------------|-------------------------------------------------|------------------------------------------------------------------|------------------------------|-------------------------------------------------|
|                  |                  |                                          | log OR <sub>yEA-NC</sub> <sup>k</sup><br>(SE)                                | P-value <sub>yEA-NC</sub> | E <sub>yEA-NC</sub> <sup>k</sup><br>(95% CI, p) | log OR <sub>eEA-NC</sub> <sup>k</sup><br>(SE)                     | P-value <sub>eEA-NC</sub>     | E <sub>eEA-NC</sub> <sup>k</sup><br>(95% CI, p) | log OR <sub>IEA-NC</sub> <sup>k</sup><br>(SE)                    | P-value <sub>IEA-NC</sub>    | E <sub>IEA-NC</sub> <sup>k</sup><br>(95% CI, p) |
| rs75932628       | TREM2 (R47H)     | 0.89 (0.09)                              | 0.48 (1.24)                                                                  | 6.97x10 <sup>-1</sup>     | 0.54 (-2.25 - 3.29, 7.4x10 <sup>-1</sup> )      | 1.41 (0.83)                                                       | 9.02x10 <sup>-2</sup>         | 1.58 (-0.25 - 3.58, 5.5x10 <sup>-1</sup> )      | 1.57 (0.68)                                                      | 2.16x10 <sup>-2</sup> *      | 1.78 (0.28 - 3.41, 3.2x10 <sup>-1</sup> )       |
| rs7920721        | ECHDC3           | 0.07 (0.01)                              | 0.16 (0.09)                                                                  | 9.11x10 <sup>-2</sup>     | 2.44 (-0.41 - 5.31, 3.2x10 <sup>-1</sup> )      | 0.16 (0.07)                                                       | 3.64x10 <sup>-2</sup> *       | 2.38 (0.12 - 5.32, 2.3x10 <sup>-1</sup> )       | 0.18 (0.07)                                                      | 7.66x10 <sup>-3</sup> *      | 2.70 (0.69 - 5.44, 9.9x10 <sup>-2</sup> )       |
| rs10498633       | SLC24A4-RIN3     | -0.09 (0.02)                             | -0.27 (0.12)                                                                 | 2.26x10 <sup>-2</sup>     | 2.88 (0.39 - 5.38, 1.4x10 <sup>-1</sup> )       | -0.16 (0.09)                                                      | 8.34x10 <sup>-2</sup>         | 1.66 (-0.19 - 3.94, 5.1x10 <sup>-1</sup> )      | -0.19 (0.08)                                                     | 1.96x10 <sup>-2</sup> *      | 2.01 (0.35 - 4.18, 2.5x10 <sup>-1</sup> )       |
| rs2718058        | NME8             | -0.08 (0.01)                             | 0.11 (0.10)                                                                  | 2.68x10 <sup>-1</sup>     | -1.40 (-3.90 - 1.08, 5.9x10 <sup>-2</sup> )     | -0.01 (0.08)                                                      | 9.40x10 <sup>-1</sup>         | 0.08 (-1.95 - 2.16, 3.7x10 <sup>-1</sup> )      | -0.05 (0.07)                                                     | 4.98x10 <sup>-1</sup>        | 0.61 (-1.23 - 2.53, 6.7x10 <sup>-1</sup> )      |
| rs72824905       | PLCG2            | -0.39 (0.06)                             | -0.56 (0.57)                                                                 | 3.28x10 <sup>-1</sup>     | 1.45 (-1.42 - 4.31, 7.5x10 <sup>-1</sup> )      | -0.38 (0.41)                                                      | 3.63x10 <sup>-1</sup>         | 0.97 (-1.19 - 3.24, 9.7x10 <sup>-1</sup> )      | -0.54 (0.39)                                                     | 1.63x10 <sup>-1</sup>        | 1.40 (-0.61 - 3.69, 7.0x10 <sup>-1</sup> )      |
| rs9271192        | HLA-DRB1         | -0.11 (0.01)                             | -0.07 (0.10)                                                                 | 5.22x10 <sup>-1</sup>     | 0.61 (-1.28 - 2.54, 6.8x10 <sup>-1</sup> )      | -0.21 (0.12)                                                      | 6.50x10 <sup>-2</sup>         | 1.98 (-0.11 - 4.43, 3.6x10 <sup>-1</sup> )      | -0.07 (0.11)                                                     | 5.11x10 <sup>-1</sup>        | 0.65 (-1.34 - 2.72, 7.1x10 <sup>-1</sup> )      |
| <b>rs1476679</b> | <b>ZCWPW1</b>    | <b>0.09 (0.01)</b>                       | -0.01 (0.10)                                                                 | 8.79x10 <sup>-1</sup>     | -0.20 (-2.43 - 1.99, 2.8x10 <sup>-1</sup> )     | <b>0.01 (0.08)</b>                                                | <b>9.13x10<sup>-1</sup></b>   | <b>0.10 (-1.73 - 1.98, 3.1x10<sup>-1</sup>)</b> | <b>0.24 (0.07)</b>                                               | <b>1.15x10<sup>-3</sup>*</b> | <b>2.73 (1.04 - 4.96, 4.3x10<sup>-2</sup>)</b>  |
| rs4147929        | ABCA7 (A>G)      | -0.14 (0.02)                             | -0.27 (0.12)                                                                 | 2.50x10 <sup>-2</sup>     | 1.88 (0.23 - 3.51, 2.9x10 <sup>-1</sup> )       | -0.19 (0.10)                                                      | 5.35x10 <sup>-2</sup>         | 1.30 (-0.01 - 2.81, 6.4x10 <sup>-1</sup> )      | -0.16 (0.09)                                                     | 7.30x10 <sup>-2</sup>        | 1.10 (-0.12 - 2.43, 8.8x10 <sup>-1</sup> )      |
| <b>rs7412</b>    | <b>APOE (ε2)</b> | <b>-0.79 (0.03)</b>                      | -1.61 (0.32)                                                                 | 7.26x10 <sup>-7</sup>     | 2.05 (1.22 - 2.87, 1.3x10 <sup>-2</sup> )       | <b>-1.41 (0.22)</b>                                               | <b>3.77x10<sup>-10</sup>*</b> | <b>1.80 (1.21 - 2.40, 8.6x10<sup>-3</sup>)</b>  | <b>-0.89 (0.16)</b>                                              | <b>2.52x10<sup>-8</sup>*</b> | <b>1.13 (0.72 - 1.56, 5.1x10<sup>-1</sup>)</b>  |
| rs13113697       | HS3ST1           | -0.07 (0.01)                             | 0.13 (0.11)                                                                  | 2.41x10 <sup>-1</sup>     | -1.93 (-5.15 - 1.28, 7.5x10 <sup>-2</sup> )     | 0.03 (0.08)                                                       | 7.16x10 <sup>-1</sup>         | -0.46 (-3.29 - 2.12, 2.5x10 <sup>-1</sup> )     | -0.03 (0.08)                                                     | 7.37x10 <sup>-1</sup>        | 0.38 (-1.94 - 2.86, 5.9x10 <sup>-1</sup> )      |
| rs616338         | ABI3             | -0.36 (0.05)                             | -0.75 (0.42)                                                                 | 7.37x10 <sup>-2</sup>     | 2.06 (-0.19 - 4.39, 3.6x10 <sup>-1</sup> )      | -0.49 (0.37)                                                      | 1.90x10 <sup>-1</sup>         | 1.35 (-0.68 - 3.60, 7.4x10 <sup>-1</sup> )      | -0.82 (0.31)                                                     | 8.01x10 <sup>-3</sup> *      | 2.27 (0.61 - 4.43, 1.3x10 <sup>-1</sup> )       |
| rs10948363       | CD2AP            | 0.10 (0.01)                              | -0.00 (0.11)                                                                 | 9.79x10 <sup>-1</sup>     | -0.01 (-2.20 - 2.18, 3.7x10 <sup>-1</sup> )     | 0.06 (0.08)                                                       | 4.89x10 <sup>-1</sup>         | 0.60 (-1.11 - 2.47, 6.4x10 <sup>-1</sup> )      | 0.07 (0.07)                                                      | 3.23x10 <sup>-1</sup>        | 0.77 (-0.77 - 2.45, 7.7x10 <sup>-1</sup> )      |
| rs429358         | APOE (ε4)        | 1.05 (0.03)                              | 1.27 (0.11)                                                                  | 8.69x10 <sup>-31</sup>    | 1.21 (1.01 - 1.42, 3.6x10 <sup>-2</sup> )       | 1.32 (0.09)                                                       | 3.76x10 <sup>-50</sup> *      | <b>1.26 (1.08 - 1.44, 3.4x10<sup>-3</sup>)</b>  | 1.42 (0.08)                                                      | 1.86x10 <sup>-66</sup> *     | 1.36 (1.19 - 1.53, 4.5x10 <sup>-4</sup> )       |
| rs11771145       | EPHA1            | -0.10 (0.01)                             | -0.04 (0.10)                                                                 | 7.06x10 <sup>-1</sup>     | 0.37 (-1.61 - 2.29, 5.1x10 <sup>-1</sup> )      | 0.00 (0.08)                                                       | 9.76x10 <sup>-1</sup>         | -0.02 (-1.55 - 1.57, 2.1x10 <sup>-1</sup> )     | -0.17 (0.07)                                                     | 1.63x10 <sup>-2</sup> *      | 1.70 (0.32 - 3.36, 3.2x10 <sup>-1</sup> )       |
| rs10838725       | CELF1            | 0.08 (0.01)                              | 0.25 (0.10)                                                                  | 1.17x10 <sup>-2</sup>     | 3.15 (0.70 - 5.60, 8.5x10 <sup>-2</sup> )       | 0.13 (0.08)                                                       | 9.61x10 <sup>-2</sup>         | 1.66 (-0.30 - 4.04, 5.1x10 <sup>-1</sup> )      | 0.02 (0.07)                                                      | 7.94x10 <sup>-1</sup>        | 0.24 (-1.65 - 2.17, 4.2x10 <sup>-1</sup> )      |
| rs28834970       | PTK2B            | 0.10 (0.01)                              | 0.25 (0.09)                                                                  | 9.04x10 <sup>-3</sup>     | 2.50 (0.60 - 4.42, 1.2x10 <sup>-1</sup> )       | 0.12 (0.07)                                                       | 1.06x10 <sup>-1</sup>         | 1.23 (-0.27 - 2.92, 7.7x10 <sup>-1</sup> )      | 0.05 (0.07)                                                      | 4.59x10 <sup>-1</sup>        | 0.52 (-0.87 - 2.01, 5.1x10 <sup>-1</sup> )      |
| <b>rs983392</b>  | <b>MS4A6A</b>    | -0.11 (0.01)                             | 0.09 (0.09)                                                                  | 3.20x10 <sup>-1</sup>     | -0.87 (-2.62 - 0.89, 6.8x10 <sup>-2</sup> )     | <b>0.12 (0.07)</b>                                                | <b>1.16x10<sup>-1</sup></b>   | <b>-1.11 (2.62 - 0.24, 2.8x10<sup>-3</sup>)</b> | <b>-0.13 (0.07)</b>                                              | <b>6.31x10<sup>-2</sup></b>  | 1.19 (-0.04 - 2.63, 7.6x10 <sup>-1</sup> )      |
| rs11218343       | SORL1            | -0.26 (0.03)                             | 0.04 (0.24)                                                                  | 8.73x10 <sup>-1</sup>     | -0.13 (-1.92 - 1.66, 2.0x10 <sup>-1</sup> )     | -0.14 (0.20)                                                      | 4.78x10 <sup>-1</sup>         | 0.54 (-0.92 - 2.11, 5.4x10 <sup>-1</sup> )      | -0.27 (0.19)                                                     | 1.54x10 <sup>-1</sup>        | 1.02 (-0.39 - 2.55, 9.8x10 <sup>-1</sup> )      |
| rs6733839        | BIN1             | 0.20 (0.01)                              | 0.21 (0.09)                                                                  | 2.49x10 <sup>-2</sup>     | 1.07 (0.12 - 2.01, 8.7x10 <sup>-1</sup> )       | 0.19 (0.07)                                                       | 1.16x10 <sup>-2</sup> *       | 0.95 (0.23 - 1.73, 9.1x10 <sup>-1</sup> )       | 0.15 (0.07)                                                      | 2.36x10 <sup>-2</sup> *      | 0.78 (0.10 - 1.48, 5.2x10 <sup>-1</sup> )       |
| rs10792832       | PICALM           | 0.14 (0.01)                              | 0.16 (0.10)                                                                  | 1.13x10 <sup>-1</sup>     | 1.11 (-0.30 - 2.51, 8.8x10 <sup>-1</sup> )      | 0.18 (0.08)                                                       | 2.10x10 <sup>-2</sup> *       | 1.28 (0.20 - 2.43, 6.1x10 <sup>-1</sup> )       | 0.16 (0.07)                                                      | 2.33x10 <sup>-2</sup> *      | 1.12 (0.16 - 2.18, 8.1x10 <sup>-1</sup> )       |
| rs7274581        | CASS4            | -0.13 (0.02)                             | -0.26 (0.18)                                                                 | 1.54x10 <sup>-1</sup>     | 1.98 (-0.75 - 4.71, 4.8x10 <sup>-1</sup> )      | -0.34 (0.15)                                                      | 2.31x10 <sup>-2</sup> *       | 2.53 (0.39 - 5.43, 1.6x10 <sup>-1</sup> )       | -0.04 (0.12)                                                     | 7.18x10 <sup>-1</sup>        | 0.33 (-1.60 - 2.24, 4.6x10 <sup>-1</sup> )      |
| rs143332484      | TREM2 (R62H)     | 0.50 (0.07)                              | 0.17 (0.37)                                                                  | 6.52x10 <sup>-1</sup>     | 0.34 (-1.10 - 1.80, 3.7x10 <sup>-1</sup> )      | 0.25 (0.28)                                                       | 3.73x10 <sup>-1</sup>         | 0.51 (-0.62 - 1.67, 3.9x10 <sup>-1</sup> )      | -0.03 (0.28)                                                     | 9.19x10 <sup>-1</sup>        | -0.06 (-1.22 - 1.09, 6.9x10 <sup>-2</sup> )     |
| rs118172952      | KANSL1           | -0.14 (0.03)                             | -0.17 (0.14)                                                                 | 2.22x10 <sup>-1</sup>     | 1.25 (-0.74 - 3.27, 8.0x10 <sup>-1</sup> )      | 0.01 (0.10)                                                       | 8.95x10 <sup>-1</sup>         | -0.10 (-1.86 - 1.57, 1.8x10 <sup>-1</sup> )     | -0.15 (0.10)                                                     | 1.26x10 <sup>-1</sup>        | 1.09 (-0.33 - 3.20, 9.1x10 <sup>-1</sup> )      |
| rs6656401        | CR1              | -0.17 (0.01)                             | -0.31 (0.11)                                                                 | 4.39x10 <sup>-3</sup>     | 1.87 (0.58 - 3.15, 1.9x10 <sup>-1</sup> )       | -0.17 (0.09)                                                      | 5.43x10 <sup>-2</sup>         | 1.02 (0.01 - 2.14, 9.6x10 <sup>-1</sup> )       | -0.08 (0.08)                                                     | 3.04x10 <sup>-1</sup>        | 0.50 (-0.46 - 1.49, 3.0x10 <sup>-1</sup> )      |
| rs200538373      | ABCA7 (G>C)      | -0.65 (0.14)                             | 0.00 (0.90)                                                                  | 9.97x10 <sup>-1</sup>     | -0.02 (-2.79 - 2.74, 4.7x10 <sup>-1</sup> )     | 0.29 (0.62)                                                       | 6.39x10 <sup>-1</sup>         | -0.45 (-2.63 - 1.52, 1.3x10 <sup>-1</sup> )     | -0.03 (0.64)                                                     | 9.57x10 <sup>-1</sup>        | 0.05 (-2.10 - 2.21, 3.6x10 <sup>-1</sup> )      |
| rs9331896        | CLU              | 0.15 (0.01)                              | 0.28 (0.10)                                                                  | 5.39x10 <sup>-3</sup>     | 1.92 (0.59 - 3.23, 1.8x10 <sup>-1</sup> )       | 0.13 (0.08)                                                       | 1.03x10 <sup>-1</sup>         | 0.86 (-0.16 - 1.93, 7.9x10 <sup>-1</sup> )      | 0.20 (0.07)                                                      | 4.89x10 <sup>-3</sup> *      | 1.34 (0.41 - 2.37, 4.6x10 <sup>-1</sup> )       |
| rs35349669       | INPP5D           | 0.08 (0.01)                              | 0.14 (0.10)                                                                  | 1.52x10 <sup>-1</sup>     | 1.82 (-0.68 - 4.35, 5.2x10 <sup>-1</sup> )      | 0.15 (0.07)                                                       | 4.23x10 <sup>-2</sup> *       | 2.04 (0.04 - 4.59, 3.1x10 <sup>-1</sup> )       | 0.04 (0.07)                                                      | 5.59x10 <sup>-1</sup>        | 0.52 (-1.33 - 2.43, 6.0x10 <sup>-1</sup> )      |

|                |               |             |                                                                        |                       |                                             |                                                                        |                       |                                             |                                                                        |                       |                                             |
|----------------|---------------|-------------|------------------------------------------------------------------------|-----------------------|---------------------------------------------|------------------------------------------------------------------------|-----------------------|---------------------------------------------|------------------------------------------------------------------------|-----------------------|---------------------------------------------|
| rs17125944     | <i>FERMT2</i> | 0.13 (0.02) | -0.15 (0.16)                                                           | $3.44 \times 10^{-1}$ | -1.17 (-3.63 - 1.24, $7.7 \times 10^{-2}$ ) | 0.01 (0.12)                                                            | $9.25 \times 10^{-1}$ | 0.08 (-1.83 - 2.01, $3.2 \times 10^{-1}$ )  | -0.04 (0.11)                                                           | $7.47 \times 10^{-1}$ | -0.27 (-2.12 - 1.45, $1.3 \times 10^{-1}$ ) |
| rs190982       | <i>MEF2C</i>  | 0.08 (0.01) | -0.11 (0.09)                                                           | $2.52 \times 10^{-1}$ | -1.43 (-3.91 - 1.03, $5.3 \times 10^{-2}$ ) | -0.05 (0.07)                                                           | $4.98 \times 10^{-1}$ | -0.67 (-2.85 - 1.33, $9.7 \times 10^{-2}$ ) | 0.03 (0.07)                                                            | $6.12 \times 10^{-1}$ | 0.45 (-1.32 - 2.41, $5.6 \times 10^{-1}$ )  |
| <b>AVERAGE</b> |               |             | <b><math>0.87 \pm 0.20</math>, <math>p = 7.3 \times 10^{-1}</math></b> |                       |                                             | <b><math>0.86 \pm 0.16</math>, <math>p = 7.9 \times 10^{-1}</math></b> |                       |                                             | <b><math>1.01 \pm 0.14</math>, <math>p = 4.6 \times 10^{-1}</math></b> |                       |                                             |

26

27

28 Abbreviations: *Rs ID*, variant ID; *Gene*, gene associated with the variant according to paper in which was first associated;  $\log OR_I^k$ , published log(odds ratio) and relative  
29 standard error, *i.e* the first or largest case-control study that reported the variant association with AD;  $\log OR_{yEA-NC}^k$ , Effect-size and relative standard error of AD association  
30 of 255 young AD cases (age at onset <60 years of age) vs. 1,664 normal controls;  $E_{yEA-NC}^k$ (95% CI,  $p$ ), change in effect size when using young AD cases (age at onset <  
31 60 years of age), 95% confidence intervals and p-value of difference relative to published effect sizes;  $\log OR_{eEA-NC}^k$ , Effect-size and relative standard error of AD association  
32 of 464 early-onset AD cases vs. normal controls;  $E_{eEA-NC}^k$ (95% CI,  $p$ ), increased effect size when using extreme AD early-onset, 95% confidence intervals and p-value of  
33 difference relative to published effect sizes;  $\log OR_{lEA-NC}^k$ , Effect-size and relative standard error of association of 609 late-onset AD cases vs. normal controls;  $E_{lEA-NC}^k$   
34 (95% CI,  $p$ ), increased effect size when using extreme AD late-onset, 95% confidence intervals and p-value of difference relative to published effect sizes; Bold type:  
35 variants with a significant difference between the effect-sizes of 464 early-onset cases (age at onset <65) and 609 late-onset cases (age at onset >65) relative to 1,664  
36 normal controls; Stars\*: p-value significant at nominal threshold ( $p < 0.05$ ).



37 **Table S5:** Functional implication of all the tested variants

| <i>Locus</i> | <i>Gene</i>         | <i>Variant</i> | <i>GO</i>                                                                                                                                                                                | <i>Literature</i>                                                    | $E_{EA-EC}^k$ |
|--------------|---------------------|----------------|------------------------------------------------------------------------------------------------------------------------------------------------------------------------------------------|----------------------------------------------------------------------|---------------|
| 6:41129252   | <i>TREM2 R47H</i>   | rs75932628     | positive regulation of antigen processing and presentation of peptide antigen via MHC class II (GO:0002588); phagocytosis (GO:0006911); humoral immune response (GO:0006569)             | -                                                                    | 6.46          |
| 10:11720308  | <i>ECHDC3</i>       | rs7920721      | metabolic process (GO:0008152)                                                                                                                                                           | -                                                                    | 4.56          |
| 14:92926952  | <i>SLC24A4</i>      | rs10498633     | transport (GO:0006810); ion transport (GO:0006811); sodium ion transport (GO:0006814)                                                                                                    | Neural development and regulation of blood pressure and hypertension | 4.50          |
| 7:37841534   | <i>NME8</i>         | rs2718058      | nucleoside diphosphate phosphorylation (GO:0006165); multicellular organism development (GO:0007275); cell differentiation (GO:0030154)                                                  | Cytoskeletal function and axonal transport                           | 3.80          |
| 16:81942028  | <i>PLCG2</i>        | rs72824905     | positive regulation of receptor internalization (GO:0002092); follicular B cell differentiation (GO:0002316); lipid metabolic process (GO:0006629)                                       | -                                                                    | 3.28          |
| 6:32578530   | <i>HLA-DRB1</i>     | rs111418223    | immune system process (GO:0002376); immunoglobulin production involved in immunoglobulin mediated immune response (GO:0002381); inflammatory response to antigenic stimulus (GO:0002437) | Immune response                                                      | 3.20          |
| 7:100004446  | <i>ZCWPW1</i>       | rs1476679      | -                                                                                                                                                                                        | Epistasis regulation and Neural development                          | 2.97          |
| 19:1063443   | <i>ABCA7 A&gt;G</i> | rs4147929      | transport (GO:0006810); phagocytosis (GO:0006909); positive regulation of cholesterol efflux (GO:0010875)                                                                                | Lipid metabolism and Immune system                                   | 2.26          |
| 19:45412079  | <i>APOE ε2</i>      | rs7412         | response to reactive oxygen species (GO:0000302); retinoid metabolic process (GO:0001523); negative regulation of endothelial cell proliferation (GO:0001937)                            | Lipid metabolism and cholesterol transport                           | 2.24          |
| 17:47297297  | <i>ABI3</i>         | rs616338       | movement of cell or subcellular component (GO:0006928); regulation of cell migration (GO:0030334)                                                                                        | -                                                                    | 2.06          |
| 4:11711232   | <i>HS3ST1</i>       | rs13113697     | glycosaminoglycan biosynthetic process (GO:0006024)                                                                                                                                      | -                                                                    | 2.06          |
| 6:47487762   | <i>CD2AP</i>        | rs10948363     | protein complex assembly (GO:0006461); substrate-dependent cell migration, cell extension (GO:0006930); cell cycle (GO:0007049)                                                          | Endosomal vesicle cycling                                            | 2.00          |

|              |                     |             |                                                                                                                                                                              |                                                    |      |
|--------------|---------------------|-------------|------------------------------------------------------------------------------------------------------------------------------------------------------------------------------|----------------------------------------------------|------|
| 19:45411941  | <i>APOE ε4</i>      | rs429358    | response to reactive oxygen species (GO:0000302); retinoid metabolic process (GO:0001523); negative regulation of endothelial cell proliferation (GO:0001937)                | Lipid metabolism and cholesterol transport         | 1.99 |
| 7:143110762  | <i>EPHA1</i>        | rs11771145  | angiogenesis (GO:0001525); positive regulation of cell-matrix adhesion (GO:0001954); protein phosphorylation (GO:0006468)                                                    | Endosomal vesicle cycling and Immune system        | 1.94 |
| 11:47557871  | <i>CELF1</i>        | rs10838725  | mRNA processing (GO:0006376); germ cell development (GO:0007281); mRNA splice site selection (GO:0006376)                                                                    | Cytoskeletal function and axonal transport         | 1.78 |
| 8:27195121   | <i>PTK2B</i>        | rs28834970  | MAPK cascade (GO:0000165); response to reactive oxygen species (GO:0000302); angiogenesis (GO:0001525)                                                                       | Cell migration and synaptic function               | 1.76 |
| 11:59923508  | <i>MS4A6A</i>       | rs983392    | -                                                                                                                                                                            | Immune response                                    | 1.56 |
| 11:121435587 | <i>SORL1</i>        | rs11218343  | protein targeting (GO:0006605); lipid metabolic process (GO:0006629); transport (GO:0006810)                                                                                 | Endosomal vesicle cycling                          | 1.48 |
| 2:127892810  | <i>BIN1</i>         | rs6733839   | endocytosis (GO:0006897); nucleus organization (GO:0006997); multicellular organism development (GO:0007275)                                                                 | Endosomal vesicle cycling                          | 1.28 |
| 11:85867875  | <i>PICALM</i>       | rs10792832  | protein complex assembly (GO:0006461); endocytosis (GO:0006897); axonogenesis (GO:0007409)                                                                                   | Endosomal vesicle cycling                          | 1.09 |
| 20:55018260  | <i>CASS4</i>        | rs7274581   | cell adhesion (GO:0007155)                                                                                                                                                   | Cytoskeletal function and axonal transport         | 1.06 |
| 17:44353222  | <i>KANSL1</i>       | rs118172952 | covalent chromatin modification (GO:0016569); histone H4-K5 acetylation (GO:0043981); histone H4-K8 acetylation (GO:0043982)                                                 | -                                                  | 0.97 |
| 6:41129207   | <i>TREM2 R62H</i>   | rs143332484 | positive regulation of antigen processing and presentation of peptide antigen via MHC class II (GO:0002588); phagocytosis (GO:0006911); humoral immune response (GO:0006569) | -                                                  | 0.97 |
| 1:207692049  | <i>CR1</i>          | rs6656401   | immune system process (GO:0002376); complement receptor mediated signaling pathway (GO:0002430); complement activation (GO:0006958)                                          | Immune response                                    | 0.75 |
| 19:1061892   | <i>ABCA7 G&gt;C</i> | rs200538373 | transport (GO:0006810); phagocytosis (GO:0006909); positive regulation of cholesterol efflux (GO:0010875)                                                                    | Lipid metabolism and Immune system                 | 0.68 |
| 8:27467686   | <i>CLU</i>          | rs9331896   | cell morphogenesis (GO:0000902); microglial cell activation (GO:0001774); immune system process (GO:0002376)                                                                 | Cholesterol and Lipid metabolism and Immune system | 0.60 |
| 2:234068476  | <i>INPP5D</i>       | rs35349669  | phosphatidylinositol biosynthetic process (GO:0006661); phosphate-containing compound metabolic process (GO:0006796); apoptotic process (GO:0006915)                         | Immune response                                    | 0.36 |

|             |               |            |                                                                                                                                          |                                                            |       |
|-------------|---------------|------------|------------------------------------------------------------------------------------------------------------------------------------------|------------------------------------------------------------|-------|
| 14:53400629 | <i>FERMT2</i> | rs17125944 | cell adhesion (GO:0007155); cell-matrix adhesion (GO:0007160); regulation of cell shape (GO:0008360)                                     | Cytoskeletal function and axonal transport                 | -0.82 |
| 5:88223420  | <i>MEF2C</i>  | rs190982   | negative regulation of transcription by RNA polymerase II (GO:0000122); MAPK cascade (GO:0000165); blood vessel development (GO:0001568) | Immune response, Neural development and synaptic functions | -1.86 |

38

39

40

41

42

43

44

Abbreviations: Locus, genomic location of the variant; Gene, the nearest gene associated with the variant in the paper that first associated the variant with AD; RsID, variant identifier, GO annotation, first three Gene Ontology (GO) biological processes associated with gene; Literature annotation, pathway(s) associated with each gene according to a recent review regarding the genetic landscape of Alzheimer's disease<sup>43</sup>;  $E_{EA-EC}^k$ , effect-size change when using extreme phenotypes relative to published effect size. Orange cells indicate variants with a decreased effect-size as compared to published effect-size. Green cells correspond to variants with an increased effect-size as compared to published effect-size.

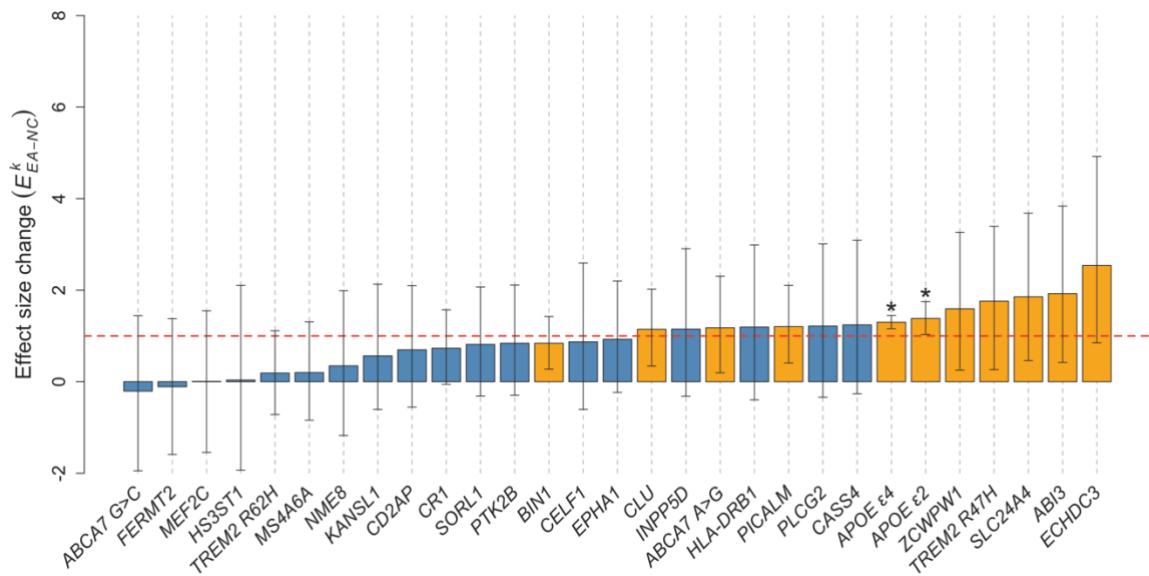

46

47 **Figure S1: Extreme AD cases vs. normal controls:  $E^k_{EA-NC}$ .** The effect-size change was  
 48 significant for 4 variants ( $p < 0.05$ , two-sample z-test; bars annotated with a star [\*]). Orange bars  
 49 indicate nominal statistical significance for the association with AD ( $p < 0.05$ ). Dashed red line  
 50 ( $E^k_{EA-NC} = 1$ ) indicates same effect-size as reported in literature.

51

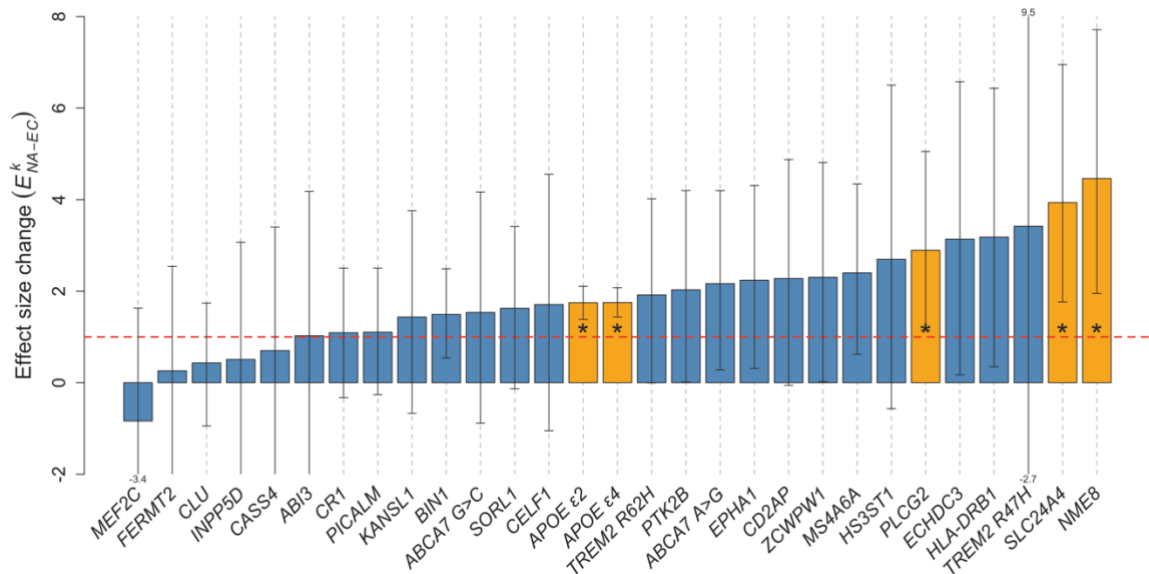

52

53 **Figure S2: Normal ADs vs. Extreme (centenarian) controls:  $E^k_{NA-EC}$ .** Effect-size change  
 54 ( $E^k_{NA-EC}$ ) was significant for 5 variants ( $p < 0.05$ , two-sample z-test; bars annotated with a star [\*]).  
 55 Orange bars indicate nominal statistical significance for the association with AD ( $p < 0.05$ ). Dashed  
 56 red line indicates same effect-size as reported in literature.

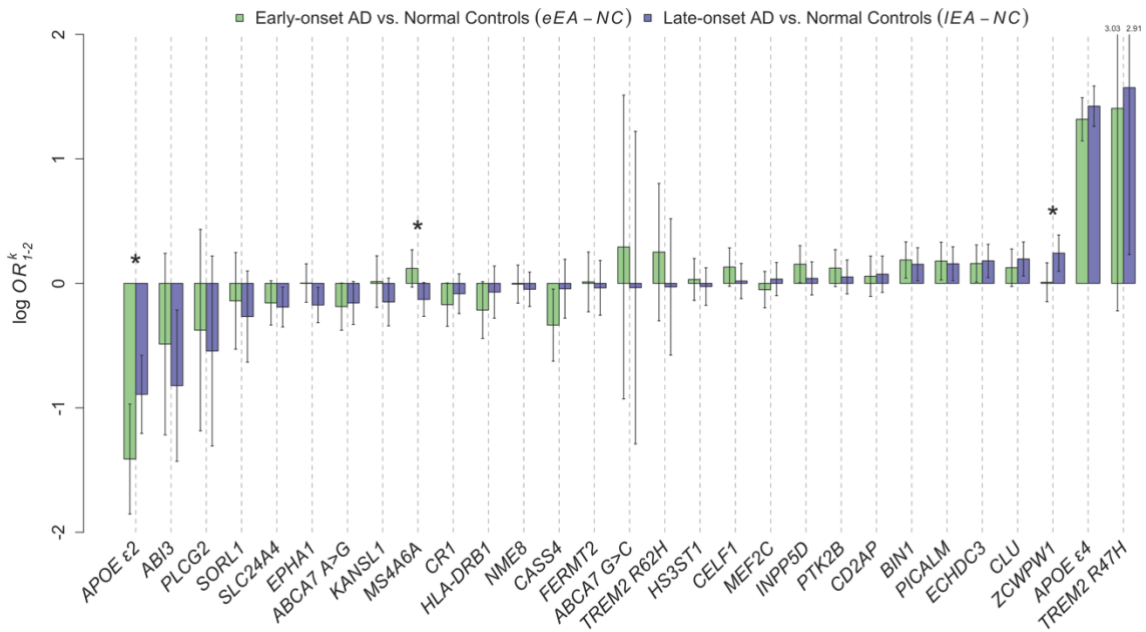

58

59 **Figure S3: Early onset AD vs normal controls and late onset AD vs normal controls.** Effect-  
 60 sizes and 95% confidence intervals of a comparison of early onset AD cases ( $\log OR_{eEA-NC}^k$ , age  
 61 at onset  $\leq 65$  years) and late-onset AD ( $\log OR_{IEA-NC}^k$ , age at onset  $> 65$  years) with normal  
 62 controls. For all the variants, the 95% confidence intervals overlapped. [\*]: difference between  
 63  $\log OR_{eEA-NC}^k$  and  $\log OR_{IEA-NC}^k$  was significant ( $p < 0.05$ , two-sample z-test).

64

65

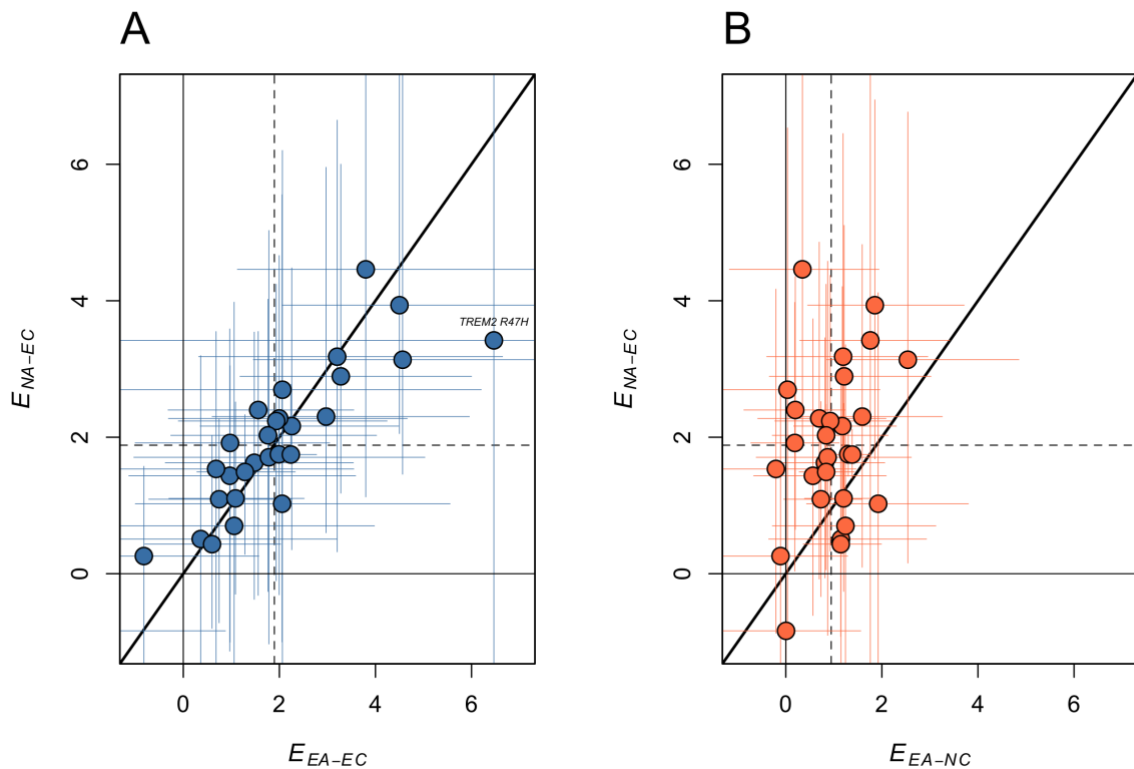

66

67 **Figure S4: Comparison of effect size changes at the variant level**

68 **A: Effect of using extreme AD cases vs normal AD cases:** X-axis:  $E^k_{EA-EC}$ : Effect size changes

69 from a comparison of the extreme cases and extreme (centenarian) controls relative to published

70 effect sizes. Dashed line x-axis average effect-size increase  $E^k_{EA-EC}$  at  $1.90 \pm 0.29$ : Y-axis:  $E^k_{NA-EC}$

71  $E^k_{NA-EC}$ : effect size changes from a comparison normal AD cases with extreme (centenarian) controls

72 relative to published effect sizes. Dashed line y-axis: average effect-size increase  $E^k_{NA-EC}$  at  $1.88$

73  $\pm 0.24$ . See Table 2 for  $E^k_{EA-EC}$  and Table S3 for  $E^k_{NA-EC}$  values

74 **B. Effect of using extreme cases vs using extreme controls:** X-axis: effect-size changes of extreme AD cases vs. normal controls

75 relative to published effect-sizes. Dashed line x-axis: average effect-size increase  $E^k_{EA-NC}$  at  $0.94$

76  $\pm 0.12$ . Y-axis: Variant effect-size change of normal AD cases vs. extreme controls relative to

77 published effect-sizes. Dashed line y-axis: average effect-size increase  $E^k_{NA-EC}$  at  $1.88 \pm 0.24$ .

78 See Table S3 for  $E^k_{EA-NC}$  and  $E^k_{NA-EC}$  values.

79
